# Supplementary material
Source: PubMed Central journal article supplement (PMC9886162)
Supplement: AJA-31-613-s001.pdf [file AJA-31-613-s001.pdf]

**Supplemental Material S1.** Demographic information regarding age at hearing aid (HA) fitting and duration of HA use. The data for the first and second ears are separated by a slash ( / ). For cells with one entry, the data were the same for the first and second implanted ears. NA = data was not available; UniCI = unilateral cochlear implantation; SEQ BiCIs = sequential bilateral implantation; SIM BiCIs = simultaneous bilateral implantation; R = right ear; L = left ear. Age at HA fit of 0.5 indicates the child was fit with hearing aid(s) within the first 6 months of life. A plus sign ( + ) sign indicates that the child is a bimodal user who still wears HA for that ear.

| ID | Gender | Listening Mode | First Implanted Ear/Second Implanted Ear |                      |                           |
|----|--------|----------------|------------------------------------------|----------------------|---------------------------|
|    |        |                | Ear                                      | Age at HA fit (Year) | Duration of HA Use (Year) |
| 1  | F      | UniCI          | R/L                                      | 0.5/0.5              | 3.7/1+                    |
| 2  | M      | SEQ BiCI       | R/L                                      | 0.5/0.5              | 2.4/8.7                   |
| 3  | F      | SEQ BiCI       | L/R                                      | NA/NA                | NA/NA                     |
| 4  | M      | UniCI          | R/L                                      | 4/NA                 | 3.3/NA                    |
| 5  | F      | UniCI          | L/R                                      | 0.5/0.5              | 0.7/0.7                   |
| 6  | M      | SEQ BiCI       | R/L                                      | 0.5/2                | 1.2/8.2                   |
| 7  | F      | SEQ BiCI       | L/R                                      | 0.5/0.5              | 1.7/4.9                   |
| 8  | F      | SEQ BiCI       | L/R                                      | 0.5/0.5              | 4.5/13.5                  |
| 9  | F      | SEQ BiCI       | L/R                                      | 0.5/0.5              | 0.75/1.5                  |
| 10 | F      | SEQ BiCI       | R/L                                      | 0.5/0.5              | 1.5/13                    |
| 11 | F      | SIM BiCI       | R/L                                      | 0.5                  | 0.5                       |
| 12 | M      | UniCI          | L/R                                      | 0.5/0.5              | 2.17/0.5+                 |
| 13 | M      | SEQ BiCI       | R/L                                      | 0.5/0.5              | 1/2                       |
| 14 | M      | UniCI          | L/R                                      | 0.5/0.5              | 1.67/1.67                 |
| 15 | M      | UniCI          | R/L                                      | 0.5/2                | 3.17/1.17                 |
| 16 | F      | UniCI          | R/L                                      | 0.5/0.5              | 1.33/0.5+                 |
| 17 | M      | UniCI          | R/L                                      | NA                   | NA                        |
| 18 | M      | SEQ BiCI       | L/R                                      | NA                   | NA                        |
| 19 | M      | SEQ BiCI       | R/L                                      | 0.5/0.5              | 1.5/5.1                   |
| 20 | M      | SIM BiCI       | R/L                                      | 0.5                  | 0.58                      |
| 21 | M      | SIM BiCI       | R/L                                      | 0                    | 0                         |
| 22 | F      | SIM BiCI       | R/L                                      | NA                   | NA                        |
| 23 | F      | SEQ BiCI       | L/R                                      | 0.5/0.5              | 0.58/4.25                 |
| 24 | M      | SEQ BiCI       | R/L                                      | 0.5/0.5              | 8.5/8.5                   |
| 25 | M      | UniCI          | R/L                                      | 0.5/NA               | 0.66/NA                   |
| 26 | F      | UniCI          | L/R                                      | 0.5/0.5              | 5/5                       |
| 27 | F      | UniCI          | L/R                                      | NA/0.5               | NA/0.5+                   |
| 28 | M      | SEQ BiCI       | R/L                                      | 0.5/0.5              | 0.92/0.92                 |
| 29 | F      | SIM BiCI       | R/L                                      | 0.5                  | 0.5                       |
| 30 | M      | UniCI          | R/L                                      | 0.5/0.5              | 1/1                       |
| 31 | F      | SIM BiCI       | R/L                                      | 0.5                  | 0.75                      |
