# Supplementary material
Source: PubMed Central journal article supplement (PMC9886162)

**Supplemental Material S2.** The trajectory of speech recognition development for the second implanted ears of children with sequential bilateral implantation. Panel A shows the trajectories with the age at activations as vertical lines. Panel B shows the trajectories shifted to the age at cochlear implant activations, as well as the average growth curve shown in thickened, royal blue line with a shaded area around the average scores (light blue), representing  $\pm 1$  standard deviation around the average values. Different colors are used for showing the data for different ears.

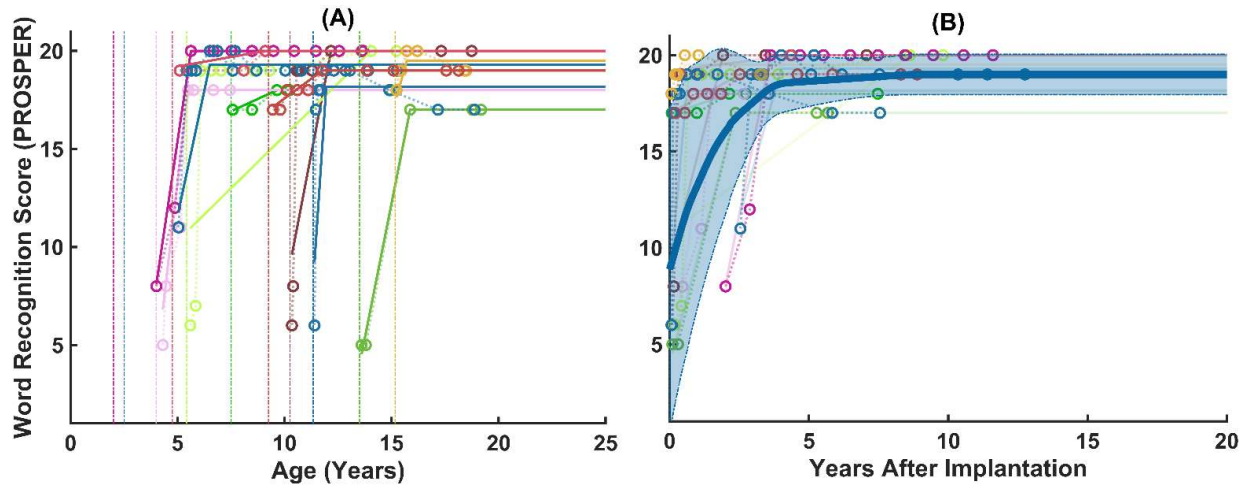

Supplement: AJA-31-613-s002.pdf [file AJA-31-613-s002.pdf]
